# Supplementary material for: Characterisation of the Porphyromonas gingivalis Manganese Transport Regulator Orthologue
Source: PLOS journal article supplement (doi:10.1371/journal.pone.0151407), 2016-03-23
Supplement: S2 (10.1371/journal.pone.0151407.s002) [file journal.pone.0151407.s002]

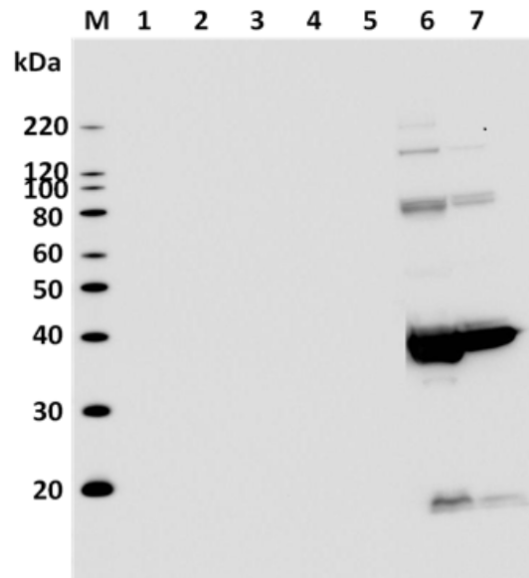

**S2 Fig. Confirmation of His-tag removal from PgMntR and variants by Western blot analysis.** SDS-PAGE of 100 ng of purified PgMntR (Lane 1) and variants (Lanes 2-5) on a 4-12% Bis-Tris polyacrylamide gel with clarified lysate of His-PgMntR *E. coli* BL21 DE3 cells as a positive control after 10-fold (Lane 6) or 50-fold dilution (Lane 7). Lane M: The MagicMark™ XP Western Protein Standard (Life Technologies). Proteins were transferred onto a PVDF membrane and probed with a monoclonal antibody against the polyhistidine tag (Sigma-Aldrich) at 1 in 3000 dilution.
