# Supplementary material for: Characterisation of the Porphyromonas gingivalis Manganese Transport Regulator Orthologue
Source: PLOS journal article supplement (doi:10.1371/journal.pone.0151407), 2016-03-23
Supplement: S9 (10.1371/journal.pone.0151407.s009) [file journal.pone.0151407.s009]

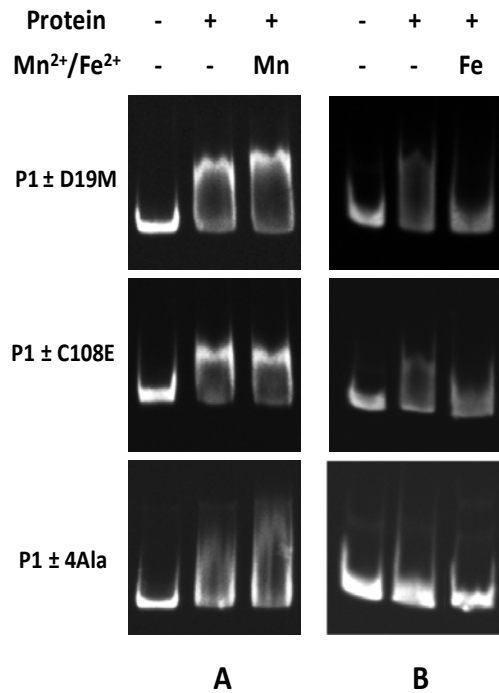

**S9 Fig. EMSAs of PgMntR variants binding to P1 DNA in the presence or absence of Mn<sup>2+</sup> or Fe<sup>2+</sup>.** (A) Reactions of 800 nM proteins with the biotinylated P1 DNA (1 nM) were performed in the presence or absence of 100 μM Mn<sup>2+</sup> in 10 mM Tris·Cl buffer (pH 7.5); (B) Reactions of 700 nM proteins with the biotinylated P1 DNA (1 nM) were performed in the presence or absence of 20 μM Fe<sup>2+</sup> in 10 mM HEPES plus 2 mM TCEP (pH 6.8). Other reagents in the reactions included 50 mM KCl, 2.5% glycerol, 0.05% NP-40 and 50 ng/μL non-specific DNA competitor poly (dI–dC). Reaction volume: 20 μL. Protein-DNA complexes were resolved on a 4% non-denaturing polyacrylamide gel in 0.5 x TBE (A) or TA buffer plus 2 mM TCEP (B) and visualized using the LightShift ® Chemiluminescent EMSA kit.
